# Supplementary material for: A 1D chiral infinite chain organic metal halide hybrid with excellent SHG switching and moderate spontaneous polarization
Source: Royal Society of Chemistry journal article supplement (doi:10.1039/d2nj00303a), 2022-01-01
Supplement: d2nj00303a1.pdf [file d2nj00303a1.pdf]

# 1D Chiral Infinite Chain Organic Metal Halide Hybrid with Excellent SHG Switch and Moderate Spontaneous Polarization

Jia-Chang Zhuang, Yui-Hui Tan<sup>\*a</sup>, Xiao-Wei Fan<sup>\*b</sup>, Yun-Zhi Tang<sup>\*b</sup>, Ning Song,

Yi-Hua Zhang, Hao Zhang and Shao-Peng Chen

## EXPERIMENTAL SECTIONS

### Synthesis

All chemical reagents are purchased directly. For the chemical synthesis of **1**, stoichiometric  $\text{Sb}_2\text{O}_3$  (1 mmol) and (S)-3-hydroxypyrrolidine hydrochloride (3 mmol) were slowly dissolved together in 5 mL of acetonitrile and hydrochloric acid (pH = 2), and then, the mixture was stirred for half an hour and filtrated. The colorless lamellar crystals of **1** were obtained after one week of slow evaporation. the yield (1.243 g) is 72.3% based on (S)-3-hydroxypyrrolidine hydrochloride. Elemental analysis for  $((\text{C}_4\text{H}_{10}\text{NO})_2\text{SbCl}_5)$ , Calc. (%), C, 20.218; H, 4.240; N, 5.890; O, 6.730; Sb, 25.618; Cl, 37.298. Found (%), C, 20.268; H, 4.238; N, 5.891; O, 6.742; Sb, 25.623; Cl, 37.238. The powder X-ray diffraction (PXRD) (**Figure S1**) and Infrared absorption (IR) spectroscopy (**Figure S2**) results confirm the phase purity of the obtained crystals. As shown in **Figure S2**,  $3490\text{ cm}^{-1}$  is the characteristic peak of -OH. The absorption peak near  $3300\text{-}2800\text{ cm}^{-1}$  was derived from the stretching vibration of C-H, and near  $3500\text{-}3400\text{ cm}^{-1}$  was derived from the stretching vibration of N-H. Near  $1350\text{-}1000\text{ cm}^{-1}$  is the absorption peak of C-N stretching vibration.

### Single Crystal X-Ray Diffraction.

The crystal structures of **1** were determined at 300 K by single crystal X-ray diffraction analyses. The data were corrected for  $L_p$  and absorption effects. Their crystal structures were solved by direct methods with the Olex 2 program. The crystal data and structure refinement for **1** are shown in **Table S1**. Their selected intra-atomic distances and bond

angles are given in **Tables S2** and **S3**. Their hydrogen bonds parameters are given in **Table S4**.

**Measurements.** Powder X-ray diffraction (PXRD) patterns were carried out on a Rigaku D/MAX 2000 PC X-ray diffraction instrument with Cu radiation ( $K_{\alpha 1}=1.54060$  Å,  $K_{\alpha 2}=1.54443$  Å). The data were collected during the heating process in the temperature range of 230-300 K for a  $\theta$  in the range of 5-50°. DSC measurements were performed by heating / cooling the powder sample at a rate of 15 K / min on a PerkinElmer Diamond DSC instrument. Thermogravimetric analysis (TGA) measurement was performed on a TA-Instruments STD2960 system from room temperature to 1050 K at a rate of 10 K / min under a nitrogen atmosphere. The dielectric constant of compounds **1** is measured by Agilent or TH2828A impedance analyzer. During heating and cooling, the powder particle sample is measured at a rate of 5 K / min. The SHG signals were measured through an FLS 920 Edinburgh instrument on a laser with low divergence (Nd: YAG, 1064 nm, 5 ns, 1.6 MW peak power, 10 Hz repetition rate). The laser is a Vibrant 355 II, OPOTEK. The ferroelectric hysteresis loop was measured on a standard RT 6000 ferroelectric tester (Albuquerque, USA). UV-vis absorption spectra were obtained using a Shimadzu (Tokyo, Japan) UV-2550 spectrophotometer in the range of 200–800 nm. The band structure and PDOS were performed by the DFT method within the total-energy code CASTEP.

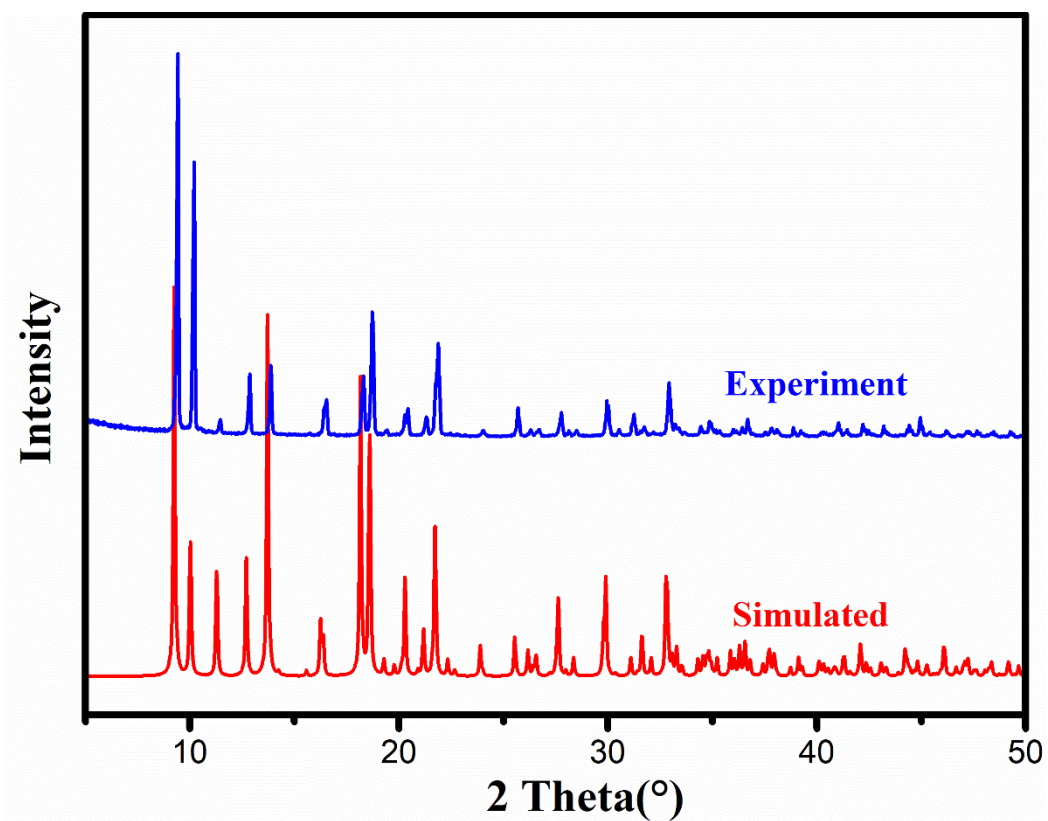

Figure S1. Simulation and measurement PXRD patterns of 1 at room temperature.

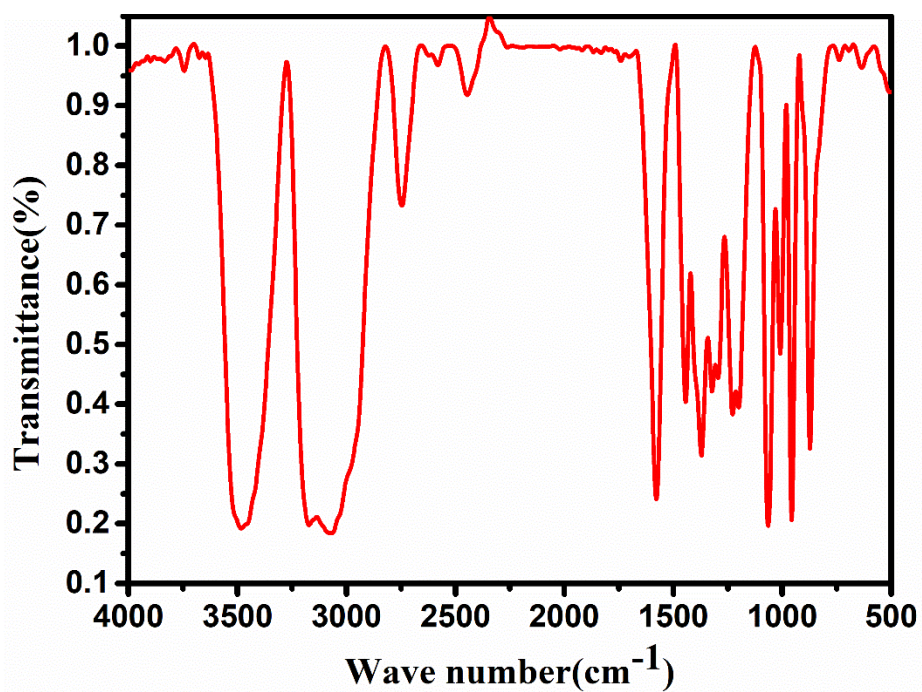

Figure S2. Infrared absorption (IR) spectroscopy of 1.

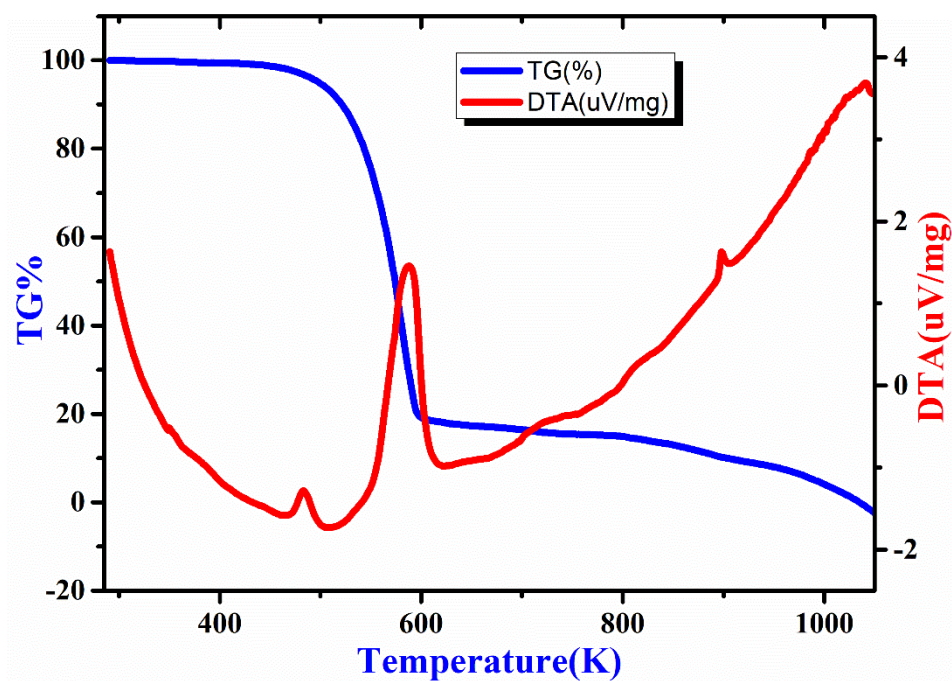

**Figure S3.** The TG-DTA (thermo gravimetric analysis and differential thermal analysis) curves of **1**.

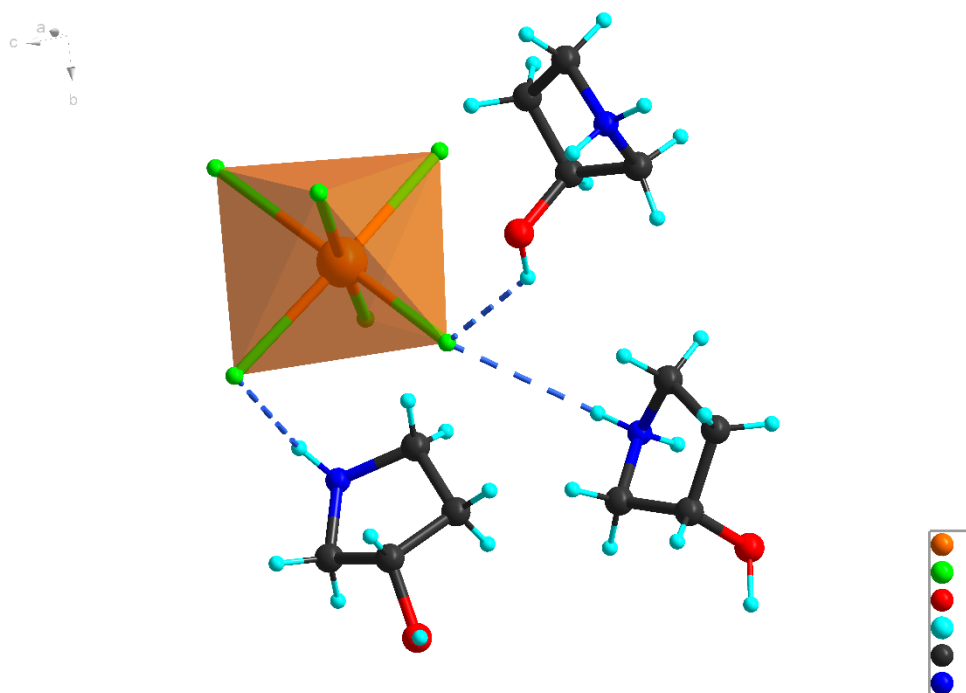

**Figure S4.** The H-bonds in the crystal structure of **1**.

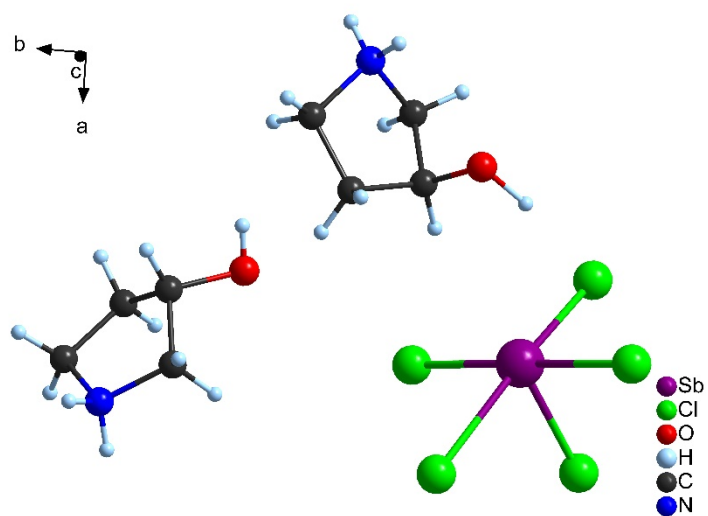

**Figure S5.** Asymmetric unit of **1** at room temperature.

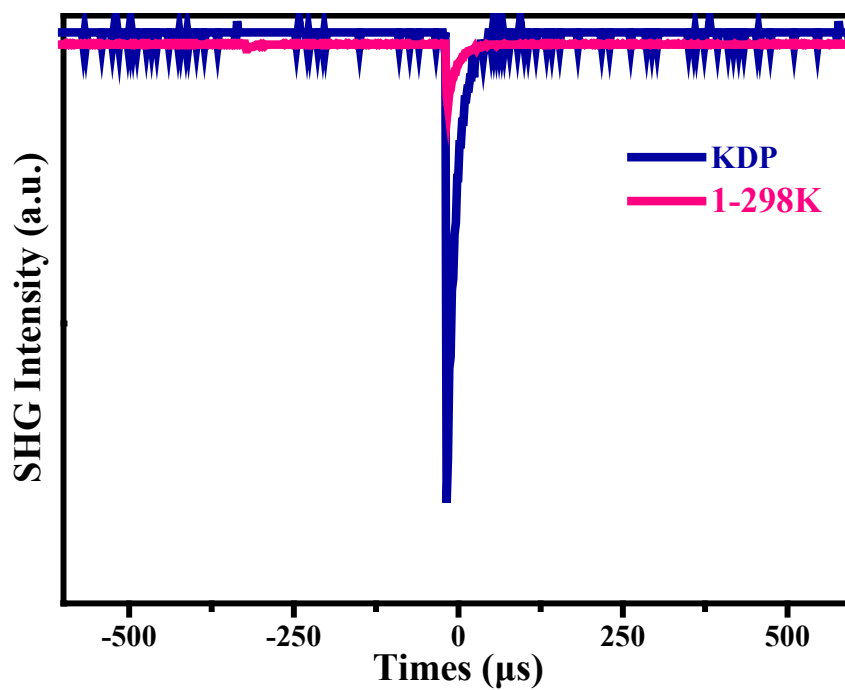

**Figure S6.** Oscilloscope traces of SHG signals for **1** at room temperature.

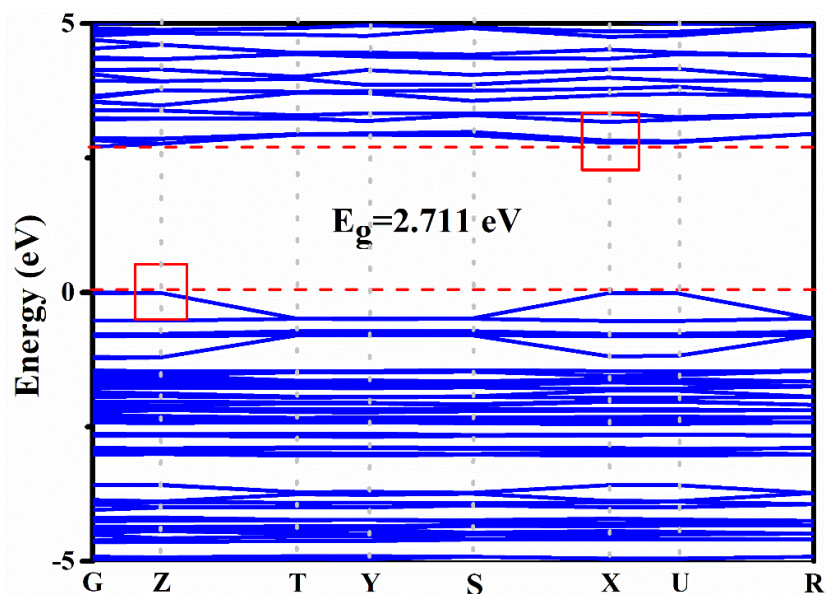

**Figure S7.** Calculated band structure of **1**.

**Table S1.** The crystallographic data of **1**.

|                              |                                                                                 |
|------------------------------|---------------------------------------------------------------------------------|
| Empirical formula            | C <sub>8</sub> H <sub>20</sub> Cl <sub>5</sub> N <sub>2</sub> O <sub>2</sub> Sb |
| Formula weight               | 475.26                                                                          |
| Temperature (K)              | 300 K                                                                           |
| Crystal system               | orthorhombic                                                                    |
| Space group                  | <i>P</i> 2 <sub>1</sub> 2 <sub>1</sub> 2 <sub>1</sub>                           |
| <i>a</i> (Å)                 | 8.7467(4)                                                                       |
| <i>b</i> (Å)                 | 11.3654(5)                                                                      |
| <i>c</i> (Å)                 | 17.6409(9)                                                                      |
| <i>V</i> (Å <sup>3</sup> )   | 1753.68(14)                                                                     |
| <i>Z</i>                     | 4                                                                               |
| Density (g/cm <sup>3</sup> ) | 1.800                                                                           |
| <i>m</i> (mm <sup>-1</sup> ) | 2.331                                                                           |
| <i>F</i> (000)               | 936.0                                                                           |
| Date/restraints/parameters   | 3074/179/137                                                                    |

|                                                             |                               |
|-------------------------------------------------------------|-------------------------------|
| GOF                                                         | 1.153                         |
| $R_1, wR_2[I > 2\sigma(I)]$                                 | $R_1 = 0.0877, wR_2 = 0.2589$ |
| $R_1, wR_2$ (all data)                                      | $R_1 = 0.1032, wR_2 = 0.2891$ |
| $\Delta\rho_{\max} / \Delta\rho_{\min}$ (eÅ <sup>-3</sup> ) | 1.61/-0.98                    |

**Table S2.** Bond lengths (Å) for **1**.

| Bond    | Lengths(Å) | Bond   | Lengths(Å) |
|---------|------------|--------|------------|
| Sb1-Cl2 | 2.964(9)   | C3-C4  | 1.4857(14) |
| Sb1-Cl5 | 2.544(7)   | C4-N1A | 1.4852(14) |
| Sb1-Cl4 | 2.421(6)   | O2-C6  | 1.4311(14) |
| Sb1-Cl3 | 2.431(7)   | C8-C7  | 1.5013(14) |
| Sb1-Cl1 | 2.696(8)   | C8-N2  | 1.4851(14) |
| O1-C3   | 1.4309(14) | C7-C6  | 1.4852(14) |
| C1-C2   | 1.5011(14) | C6-C5  | 1.4852(14) |
| C1-N1A  | 1.4849(14) | C5-N2  | 1.4851(14) |
| C2-C3   | 1.4850(14) |        |            |

**Table S3.** Bond angles (°) for **1**.

| Bond        | Angles (°) | Bond      | Angles (°) |
|-------------|------------|-----------|------------|
| Cl5-Sb1-Cl2 | 89.6(3)    | O1-C3-C2  | 106.99(14) |
| Cl5-Sb1-Cl1 | 177.9(3)   | O1-C3-C4  | 106.98(14) |
| Cl4-Sb1-Cl2 | 176.0(3)   | C2-C3-C4  | 103.96(13) |
| Cl4-Sb1-Cl5 | 90.4(2)    | C3-C4-N1A | 104.71(13) |
| Cl4-Sb1-Cl1 | 91.6(3)    | C1-N1A-C4 | 108.0(5)   |
| Cl3-Sb1-Cl2 | 86.2(3)    | N2-C8-C7  | 107.31(13) |
| Cl3-Sb1-Cl5 | 91.2(3)    | C6-C7-C8  | 103.91(12) |
| Cl3-Sb1-Cl4 | 89.7(3)    | O2-C6-C7  | 106.97(14) |
| Cl3-Sb1-Cl1 | 89.1(4)    | O2-C6-C5  | 106.97(14) |

|             |            |          |            |
|-------------|------------|----------|------------|
| C11-Sb1-C12 | 88.4(3)    | C7-C6-C5 | 103.94(13) |
| N1A-C1-C2   | 105.0(8)   | C6-C5-N2 | 104.71(13) |
| C3-C2-C1    | 103.93(13) | C5-N2-C8 | 96.7(3)    |

**Table S4.** Hydrogen bonds of **1** at 300 K.

| D-H...A        | D(D-H) | D(H...A) | < DHA | d(D...A) |
|----------------|--------|----------|-------|----------|
| O1-H1...C11    | 0.82   | 2.30     | 157   | 3.068    |
| N2-H2...C14    | 1.07   | 2.04     | 130   | 2.853    |
| N1A-H1Ab...C11 | 0.89   | 2.64     | 144   | 3.40     |
| N2-H2C...C14   | 0.89   | 2.82     | 151   | 3.625    |

### Calculation of the $\Delta S$ and $N$ value for compounds in the heating and cooling cycles

Calculation of  $\Delta S_1$  and  $N$  in the heating cycle

$$\begin{aligned}\Delta S_1 &= \int_{T^1}^{T^2} \frac{Q}{T} dT \\ &\approx \frac{\Delta H}{T^c} \\ &= \frac{10.2468 \text{ J} \cdot \text{g}^{-1} \times 469.21 \text{ g} \cdot \text{mol}^{-1}}{266.6 \text{ K}} \\ &= 18.03 \text{ J} \cdot \text{mol}^{-1} \cdot \text{K}^{-1} \\ \Delta S_1 &= R \ln N_1 \\ N_1 &= \exp\left(\frac{\Delta S_1}{R}\right) = \exp\left(\frac{18.03 \text{ J} \cdot \text{mol}^{-1} \cdot \text{K}^{-1}}{8.314 \text{ J} \cdot \text{mol}^{-1} \cdot \text{K}^{-1}}\right) \\ &= 2.17\end{aligned}$$

Calculation of  $\Delta S_2$  and  $N$  in the cooling cycle

$$\Delta S_2 = \int_{T^1}^{T^2} \frac{Q}{T} dT$$



$$\approx \frac{\Delta H}{T^c}$$

$$= \frac{7.9318 \text{ J} \cdot \text{g}^{-1} \times 469.21 \text{ g} \cdot \text{mol}^{-1}}{263 \text{ K}}$$

$$= 14.15 \text{ J} \cdot \text{mol}^{-1} \cdot \text{K}^{-1}$$

$$\Delta S_2 = R \ln N_2$$

$$N_2 = \exp\left(\frac{\Delta S_2}{R}\right) = \exp\left(\frac{14.15 \text{ J} \cdot \text{mol}^{-1} \cdot \text{K}^{-1}}{8.314 \text{ J} \cdot \text{mol}^{-1} \cdot \text{K}^{-1}}\right)$$

$$= 1.70$$
